# Supplementary material
Source: PubMed Central journal article supplement (PMC3172835)
Supplement: psb0605_0680SD1.pdf [file psb0605_0680SD1.pdf]

10 20 30 40 50 60 70 80 90 100 110 120 130  
Os\_PAM1 MDRLLVPEPTNEVVRVPEGRPARGELTLRNRAMHTMPVAFRLQPAVRSRFAVRPHTGLLAPLAAVTVVVYLASEGPPGGGGGAGRGEDAFLHLSVVAPGAAVREPVTALDSVNPEWFSARRKQVFDVDSGIRACF  
Zm\_PAM1 MDRLLVPEPTNEVVRVPEGRQARGELTLRNRAMHTMPVAFRLQPAVRSRFAVRPHTGLLAPLAAVTVVVYLASEGPPGGGGGAGRGEDAFLHLSVVAPGAAVKEPVTALDSVNPEWFSARRKQVFDVDSGIRACF  
Sb\_PAM1 MDRLLVPEPTNEVVRVPEGRQARGELTLRNRAMHTMPVAFRLQPAVRSRFAVRPHTGLLAPLAAVTVVVYLASEGPPGGGGGAGRGEDAFLHLSVVAPGAAVKEPVTALDSVNPEWFSARRKQVFDVDSGIRACF  
Ph\_PAM1 MDRLLSLEPSNVVTRLEPQKCSGLTLRNVMTMPVAFRLQPLNKRIRPQSGIISPLTTITLIEIYHLPNPTLPSTPFDSDHFLHLSVVAPGAANNKATSLDMVPIDWFTTKKQVFDVDSGIRACF  
Sl\_PAM1 MDRLLSLEPSNVVTRLEPQKCSGLTLRNVMTMPVAFRLQPLNKRIRPQSGIISPLTTITLIEIYHLPNPTLPSTPFDSDHFLHLSVVAPGAANNKATSLDMVPIDWFTTKKQVFDVDSGIRACF  
St\_PAM1 MDRLLSLEPSNVVTRLEPQKCSGLTLRNVMTMPVAFRLQPLNKRIRPQSGIISPLTTITLIEIYHLPNPTLPSTPFDSDHFLHLSVVAPGAANNKATSLDMVPIDWFTTKKQVFDVDSGIRACF  
Vv\_PAM1 MDRLLSLEPSNVVTRLEPQKCSGLTLRNVMTMPVAFRLQPLNKRIRPQSGIISPLTTITLIEIYHLPNPTLPSTPFDSDHFLHLSVVAPGAANNKATSLDMVPIDWFTTKKQVFDVDSGIRACF  
Pt\_PAM1 MDRLLSLEPSNVVTRLEPQKCSGLTLRNVMTMPVAFRLQPLNKRIRPQSGIISPLTTITLIEIYHLPNPTLPSTPFDSDHFLHLSVVAPGAANNKATSLDMVPIDWFTTKKQVFDVDSGIRACF  
Rc\_PAM1 MDRLLSLEPSNVVTRLEPQKCSGLTLRNVMTMPVAFRLQPLNKRIRPQSGIISPLTTITLIEIYHLPNPTLPSTPFDSDHFLHLSVVAPGAANNKATSLDMVPIDWFTTKKQVFDVDSGIRACF  
Gm\_PAM1 MDRLLSLEPSNVVTRLEPQKCSGLTLRNVMTMPVAFRLQPLNKRIRPQSGIISPLTTITLIEIYHLPNPTLPSTPFDSDHFLHLSVVAPGAANNKATSLDMVPIDWFTTKKQVFDVDSGIRACF  
Mt\_Vpy MDRLLSLEPSNVVTRLEPQKCSGLTLRNVMTMPVAFRLQPLNKRIRPQSGIISPLTTITLIEIYHLPNPTLPSTPFDSDHFLHLSVVAPGAANNKATSLDMVPIDWFTTKKQVFDVDSGIRACF  
Pp\_PAM1 MDRLLSLEPSNVVTRLEPQKCSGLTLRNVMTMPVAFRLQPLNKRIRPQSGIISPLTTITLIEIYHLPNPTLPSTPFDSDHFLHLSVVAPGAANNKATSLDMVPIDWFTTKKQVFDVDSGIRACF

REPEAT 1 REPEAT 2 REPEAT 3 REPEAT 4  
140 150 160 170 180 190 200 210 220 230 240 250 260 270  
Os\_PAM1 VGSAAARLVEAGVAEALREVLDSEPEWRAADAVDE-SGRTLLDLAVGLGRADIVQVLEYGADADKPSR--GRTPLETAAASGCLIAELLANGATPA----GSDALHVAAGAHNDVLLKLLGKPPASAPSSASSASFCSFTSIDAAGR  
Zm\_PAM1 VGSAAARLVEAGVAEALREVLDSEPEWRAADAVDE-SGRTLLDLAVGLGRADIVQVLEYGADADKPSR--GRTPLETAAASGCLIAELLANGATPA----GSDAIHVAAGAHNDVLLKLLGKPPASAPSSASSASFSSFTSIDAAGR  
Sb\_PAM1 VGSAAARLVEAGVAEALREVLDSEPEWRAADAVDE-SGRTLLDLAVGLGRADIVQVLEYGADADKPSR--GRTPLETAAASGCLIAELLANGATPA----GSDAIHVAAGAHNDVLLKLLGKPPASAPSSASSASFSSFTSIDAAGR  
Ph\_PAM1 VGSPLVLCYLRKGYMDEIRVLEKSDYCNKPVDSVDF-EQOTLLHLAISQSRADIVOLLEFPGNIEAHSR-SCSSPLEEAASGALIVLELLAKKAKTERTEY-SASGPIHLAAGNGHLEVRLLKLLKGAN-----VNSLTK  
Sl\_PAM1 IGSPLVLCYLRKGYMDEIRVLEKSDYCNKPVDSVDF-EQOTLLHLAISQSRADIVOLLEFPGNIEAHSR-SCSSPLEEAASGALIVLELLAKKAKTERTEY-SASGPIHLAAGNGHLEVRLLKLLKGAN-----VNSLTK  
St\_PAM1 IGSPLVLCYLRKGYMDEIRVLEKSDYCNKPVDSVDF-EQOTLLHLAISQSRADIVOLLEFPGNIEAHSR-SCSSPLEEAASGALIVLELLAKKAKTERTEY-SASGPIHLAAGNGHLEVRLLKLLKGAN-----VNSLTK  
Vv\_PAM1 IGSPLVLCYLRKGYMDEIRVLEKSDYCNKPVDSVDF-EQOTLLHLAISQSRADIVOLLEFPGNIEAHSR-SCSSPLEEAASGALIVLELLAKKAKTERTEY-SASGPIHLAAGNGHLEVRLLKLLKGAN-----VNSLTK  
Pt\_PAM1 VGSPLVLCYLRKGYMDEIRVLEKSDYCNKPVDSVDF-EQOTLLHLAISQSRADIVOLLEFPGNIEAHSR-SCSSPLEEAASGALIVLELLAKKAKTERTEY-SASGPIHLAAGNGHLEVRLLKLLKGAN-----VNSLTK  
Rc\_PAM1 VGSPLVLCYLRKGYMDEIRVLEKSDYCNKPVDSVDF-EQOTLLHLAISQSRADIVOLLEFPGNIEAHSR-SCSSPLEEAASGALIVLELLAKKAKTERTEY-SASGPIHLAAGNGHLEVRLLKLLKGAN-----VNSLTK  
Gm\_PAM1 VGSPLVLCYLRKGYMDEIRVLEKSDYCNKPVDSVDF-EQOTLLHLAISQSRADIVOLLEFPGNIEAHSR-SCSSPLEEAASGALIVLELLAKKAKTERTEY-SASGPIHLAAGNGHLEVRLLKLLKGAN-----VNSLTK  
Mt\_Vpy VGSPLVLCYLRKGYMDEIRVLEKSDYCNKPVDSVDF-EQOTLLHLAISQSRADIVOLLEFPGNIEAHSR-SCSSPLEEAASGALIVLELLAKKAKTERTEY-SASGPIHLAAGNGHLEVRLLKLLKGAN-----VNSLTK  
Pp\_PAM1 VGSPLVLCYLRKGYMDEIRVLEKSDYCNKPVDSVDF-EQOTLLHLAISQSRADIVOLLEFPGNIEAHSR-SCSSPLEEAASGALIVLELLAKKAKTERTEY-SASGPIHLAAGNGHLEVRLLKLLKGAN-----VNSLTK

REPEAT 5 REPEAT 6 REPEAT 7 REPEAT 8  
280 290 300 310 320 330 340 350 360 370 380 390  
Os\_PAM1 DGKTPRLRAAEAGRRDAVKALLAAGARADARCGA-DGGTALHAAARRGDEVIARLILANGGTAARVDA-AGKTAPEIAEAECHGGIMDFLGLGEA-ILAAARKGEARAVRRAADGGASVEGRDA  
Zm\_PAM1 DGKTPRLRAAEAGRRDAVKALLAAGARADARCGA-DGGTALHAAARRGDEAVARLLSHGGTASVRDV-AGKTAPEIAEAECHGGIMDFLGLGEA-ILAAARKGEARAVRRAADGGASVEGRDA  
Sb\_PAM1 DGKTPRLRAAEAGRRDAVKALLAAGARADARCGT-DGGTALHAAARRGDEAVARLLSHGGTASVRDV-AGKTAPEIAEAECHGGIMDFLGLGEA-ILAAARKGEARAVRRAADGGASVEGRDA  
Ph\_PAM1 DGSTALHLAVEERRRDCARLLANGARADARCGA-DGGTALHAAARRGDEAVARLLSHGGTASVRDV-AGKTAPEIAEAECHGGIMDFLGLGEA-ILAAARKGEARAVRRAADGGASVEGRDA  
Sl\_PAM1 DGNTALHIAVEEGRRDCVRVLLANGARADARNEG-NCDTPLHIAAAGLGDHVMVRLVQKGAENKRNK-YGRTAYDVAABHGHNKLPDARLGDG-LCVAARKGEVRTIQRLLENGAINGRDO  
St\_PAM1 DGNTALHIAVEEGRRDCVRVLLANGARADARNEG-NCDTPLHIAAAGLGDHVMVRLVQKGAENKRNK-YGRTAYDVAABHGHNKLPDARLGDG-LCVAARKGEVRTIQRLLENGAINGRDO  
Vv\_PAM1 DGNTALHIAVEEGRRDCVRVLLANGARADARNEG-NCDTPLHIAAAGLGDHVMVRLVQKGAENKRNK-YGRTAYDVAABHGHNKLPDARLGDG-LCVAARKGEVRTIQRLLENGAINGRDO  
Pt\_PAM1 DGNTALHIAVEEGRRDCVRVLLANGARADARNEG-NCDTPLHIAAAGLGDHVMVRLVQKGAENKRNK-YGRTAYDVAABHGHNKLPDARLGDG-LCVAARKGEVRTIQRLLENGAINGRDO  
Rc\_PAM1 DGNTALHIAVEEGRRDCVRVLLANGARADARNEG-NCDTPLHIAAAGLGDHVMVRLVQKGAENKRNK-YGRTAYDVAABHGHNKLPDARLGDG-LCVAARKGEVRTIQRLLENGAINGRDO  
Gm\_PAM1 DGNTALHIAVEEGRRDCVRVLLANGARADARNEG-NCDTPLHIAAAGLGDHVMVRLVQKGAENKRNK-YGRTAYDVAABHGHNKLPDARLGDG-LCVAARKGEVRTIQRLLENGAINGRDO  
Mt\_Vpy DGNTALHIAVEEGRRDCVRVLLANGARADARNEG-NCDTPLHIAAAGLGDHVMVRLVQKGAENKRNK-YGRTAYDVAABHGHNKLPDARLGDG-LCVAARKGEVRTIQRLLENGAINGRDO  
Pp\_PAM1 DGNTALHIAVEEGRRDCVRVLLANGARADARNEG-NCDTPLHIAAAGLGDHVMVRLVQKGAENKRNK-YGRTAYDVAABHGHNKLPDARLGDG-LCVAARKGEVRTIQRLLENGAINGRDO

REPEAT 9 REPEAT 10 REPEAT 11  
400 410 420 430 440 450 460 470 480 490 500 510 520 530  
Os\_PAM1 HGWTALHRAAFKGRADTVRDLVDRGADMDATDA-EGYALHCAAEAGRADVDLLKSGANAKTTV-KGRSAAEVAAAGKSKVVRLLKAGGVGRKEVA----EKTSPAUVGKAGSLDRRRRGRKSSGAIKRFGGGKGFETAAVVGVWSH  
Zm\_PAM1 HGWTALHRAAFKGRADTVRDLVDRGADMDAADA-DGYALHCAAEAGRADVDLLKNGANVKAATV-KGRTAADAATAAGKSKVVRLLDKATIMGO DVS-----EKVAPA--VAKGSMRKRARRKSSGAIKRFGGGKGFETAAVVGVWSH  
Sb\_PAM1 HGWTALHRAAFKGRADTVRDLVDRGADMDAADA-EGYALHCAAEAGRADVDLLKNGANVKAATV-KGRTAADAATAAGKSKVVRLLDKATIMGO DVS-----KVAPA--VAKGSMRKRARRKSSGAIKRFGGGKGFETAAVVGVWSH  
Ph\_PAM1 HGWTALHRAAFKGRADTVRDLVDRGADMDAADA-EGYALHCAAEAGRADVDLLKNGANVKAATV-KGRTAADAATAAGKSKVVRLLDKATIMGO DVS-----ETNIVKSSGIAVRLDIDGTTIKKRS-VNKS-RTR--RSSFDRN-APLAVL  
Sl\_PAM1 HGWTALHRAAFKGRADTVRDLVDRGADMDAADA-EGYALHCAAEAGRADVDLLKNGANVKAATV-KGRTAADAATAAGKSKVVRLLDKATIMGO DVS-----KLEMMIAKSYGKMTKEVEIIGSVKRRSHVNKSSRVR--RSSIDRT-T  
St\_PAM1 HGWTALHRAAFKGRADTVRDLVDRGADMDAADA-EGYALHCAAEAGRADVDLLKNGANVKAATV-KGRTAADAATAAGKSKVVRLLDKATIMGO DVS-----KLEMMIAKSYGKMTKEVEIIGSVKRRSHVNKSSRVR--RSSIDRT-VPL  
Vv\_PAM1 HGWTALHRAAFKGRADTVRDLVDRGADMDAADA-EGYALHCAAEAGRADVDLLKNGANVKAATV-KGRTAADAATAAGKSKVVRLLDKATIMGO DVS-----KLEMMIAKSYGKMTKEVEIIGSVKRRSHVNKSSRVR--RSSIDRT-VPL  
Pt\_PAM1 HGWTALHRAAFKGRADTVRDLVDRGADMDAADA-EGYALHCAAEAGRADVDLLKNGANVKAATV-KGRTAADAATAAGKSKVVRLLDKATIMGO DVS-----KLEMMIAKSYGKMTKEVEIIGSVKRRSHVNKSSRVR--RSSIDRT-VPL  
Rc\_PAM1 HGWTALHRAAFKGRADTVRDLVDRGADMDAADA-EGYALHCAAEAGRADVDLLKNGANVKAATV-KGRTAADAATAAGKSKVVRLLDKATIMGO DVS-----KLEMMIAKSYGKMTKEVEIIGSVKRRSHVNKSSRVR--RSSIDRT-VPL  
Gm\_PAM1 HGWTALHRAAFKGRADTVRDLVDRGADMDAADA-EGYALHCAAEAGRADVDLLKNGANVKAATV-KGRTAADAATAAGKSKVVRLLDKATIMGO DVS-----KLEMMIAKSYGKMTKEVEIIGSVKRRSHVNKSSRVR--RSSIDRT-VPL  
Mt\_Vpy HGWTALHRAAFKGRADTVRDLVDRGADMDAADA-EGYALHCAAEAGRADVDLLKNGANVKAATV-KGRTAADAATAAGKSKVVRLLDKATIMGO DVS-----KLEMMIAKSYGKMTKEVEIIGSVKRRSHVNKSSRVR--RSSIDRT-VPL  
Pp\_PAM1 HGWTALHRAAFKGRADTVRDLVDRGADMDAADA-EGYALHCAAEAGRADVDLLKNGANVKAATV-KGRTAADAATAAGKSKVVRLLDKATIMGO DVS-----KLEMMIAKSYGKMTKEVEIIGSVKRRSHVNKSSRVR--RSSIDRT-VPL
